# Supplementary material
Source: PubMed Central journal article supplement (PMC6899201)
Supplement: NIHMS1541614-supplement-1.pdf [file NIHMS1541614-supplement-1.pdf]

## Supplementary Information

Supplementary Note 1. Sequence alignment of gp120s from structures of the indicated complexes demonstrates similarities and differences in interactions.

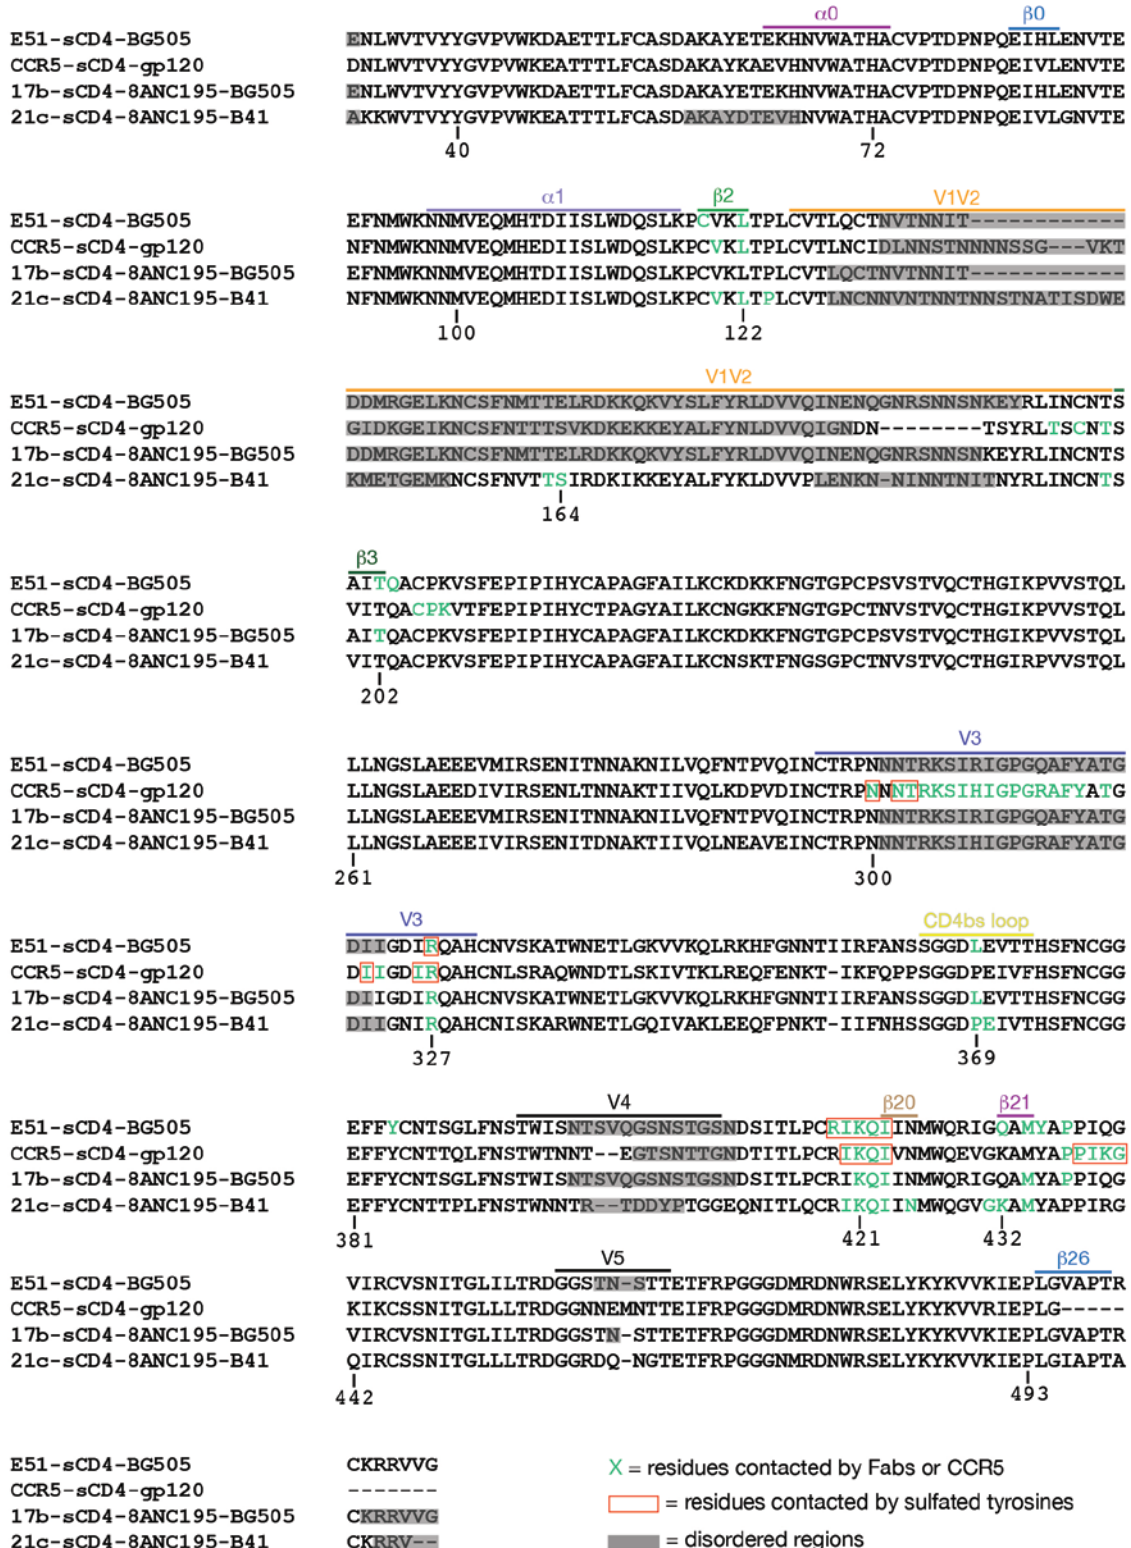

## Supplementary Tables

| Trimer state    | Trimer type     | Ligand(s)         | Method  | PDB  | Resolution (Å) | Distance(s) between V3 (His330) (Å) | Distance(s) between V1V2 (Pro124) (Å) | Distance(s) between CD4bs (Asp368) (Å) |
|-----------------|-----------------|-------------------|---------|------|----------------|-------------------------------------|---------------------------------------|----------------------------------------|
| Closed          | BG505 SOSIP.664 | 8ANC195           | X-ray   | 5CJX | 3.6            | 68                                  | 14                                    | 54                                     |
| Closed          | BG505 SOSIP.664 | PGT122, 35O22     | X-ray   | 4TVP | 3.5            | 69                                  | 15                                    | 55                                     |
| Closed          | BG505 SOSIP.664 | PGT122            | X-ray   | 4NCO | 4.7            | 70                                  | 14                                    | 56                                     |
| Closed          | BG505 SOSIP.664 | 3H+109L 35O22     | X-ray   | 5CEZ | 3              | 69                                  | 14                                    | 56                                     |
| Closed          | BG505 SOSIP.664 | IOMA, 35O22       | X-ray   | 5T3Z | 3.5            | 69                                  | 14                                    | 54                                     |
| Closed          | JR-FL EnvΔCT    | PGT151            | cryo-EM | 5FUU | 4.2            | 69                                  | 16                                    | 56                                     |
|                 |                 |                   |         |      |                |                                     |                                       |                                        |
| Partially open  | BG505 SOSIP.664 | sCD4, 17b 8ANC195 | cryo-EM | 6CM3 | 3.5            | 76                                  | 67                                    | 79                                     |
| Partially open  | B41 SOSIP.664   | sCD4, 21c 8ANC195 | cryo-EM | 6EDU | 4.1            | 73                                  | 69                                    | 79                                     |
|                 |                 |                   |         |      |                |                                     |                                       |                                        |
| Open            | B41 SOSIP.664   | sCD4, 17b         | cryo-EM | 5VN8 | 3.6            | 73                                  | 79                                    | 84                                     |
| Open (Class I)  | BG505 SOSIP.664 | sCD4, E51         | cryo-EM | 6U0L | 3.3            | 75, 80, 70                          | 67, 75, 70                            | 79, 85, 78                             |
| Open (Class II) | BG505 SOSIP.664 | sCD4, E51         | cryo-EM | 6U0N | 3.5            | 81, 73, 70                          | 76, 77, 70                            | 85, 83, 79                             |

**Supplementary Table 1. Distance comparisons in Env trimer structures.** Structures are grouped into four conformational states: closed (unliganded and bound to Fabs), partially open (bound to 8ANC195, sCD4, and either 17b or 21c), and open (bound to sCD4 and 17b), and the open class I and class II E51-sCD4-BG505 complexes (this study). The PDB identifier is given for each structure. PDB coordinates for gp120 subunits within a trimer were used to measure distances on adjacent protomers between V3 base residue His330<sub>gp120</sub>, V1V2 base residue Pro124<sub>gp120</sub>, and the CD4 binding site residue Asp368<sub>gp120</sub>.

**Supplementary Table 2. PDB entries for structures presented in Extended Data Figure 5 and their corresponding references.**

| PDB  | Reference                                                                                                                                                                                                                                                   |
|------|-------------------------------------------------------------------------------------------------------------------------------------------------------------------------------------------------------------------------------------------------------------|
| 6CM3 | Wang, H., Barnes, C.O., Yang, Z., Nussenzweig, M.C. & Bjorkman, P.J. Partially Open HIV-1 Envelope Structures Exhibit Conformational Changes Relevant for Coreceptor Binding and Fusion. <i>Cell Host Microbe</i> <b>24</b> , 579-592 e4 (2018)             |
| 5VN3 | Ozorowski, G. et al. Open and closed structures reveal allostery and pliability in the HIV-1 envelope spike. <i>Nature</i> <b>547</b> , 360-363 (2017)                                                                                                      |
| 4TVP | Pancera, M. et al. Structure and immune recognition of trimeric pre-fusion HIV-1 Env. <i>Nature</i> <b>514</b> , 455-61 (2014)                                                                                                                              |
| 4ZMJ | Kwon, Y.D. et al. Crystal structure, conformational fixation and entry-related interactions of mature ligand-free HIV-1 Env. <i>Nat Struct Mol Biol</i> <b>22</b> , 522-31 (2015)                                                                           |
| 5FYJ | Stewart-Jones, G.B.E. et al. Trimeric HIV-1-Env Structures Define Glycan Shields from Clades A, B, and G. <i>Cell</i> <b>165</b> , 813-26 (2016)                                                                                                            |
| 5FYK | Stewart-Jones, G.B.E. et al. Trimeric HIV-1-Env Structures Define Glycan Shields from Clades A, B, and G. <i>Cell</i> <b>165</b> , 813-26 (2016)                                                                                                            |
| 5FYL | Stewart-Jones, G.B.E. et al. Trimeric HIV-1-Env Structures Define Glycan Shields from Clades A, B, and G. <i>Cell</i> <b>165</b> , 813-26 (2016)                                                                                                            |
| 5I8H | Kong, R. et al. Fusion peptide of HIV-1 as a site of vulnerability to neutralizing antibody. <i>Science</i> <b>352</b> , 828-33 (2016)                                                                                                                      |
| 5JS9 | Kong, L. et al. Uncleaved prefusion-optimized gp140 trimers derived from analysis of HIV-1 envelope metastability. <i>Nat Commun</i> <b>7</b> , 12040 (2016)                                                                                                |
| 5JSA | Kong, L. et al. Uncleaved prefusion-optimized gp140 trimers derived from analysis of HIV-1 envelope metastability. <i>Nat Commun</i> <b>7</b> , 12040 (2016)                                                                                                |
| 5ACO | Lee, J.H., de Val, N., Lyumkis, D. & Ward, A.B. Model Building and Refinement of a Natively Glycosylated HIV-1 Env Protein by High-Resolution Cryoelectron Microscopy. <i>Structure</i> <b>23</b> , 1943-51 (2015)                                          |
| 5C7K | Kong, L. et al. Complete epitopes for vaccine design derived from a crystal structure of the broadly neutralizing antibodies PGT128 and 8ANC195 in complex with an HIV-1 Env trimer. <i>Acta Crystallogr D Biol Crystallogr</i> <b>71</b> , 2099-108 (2015) |
| 5T3Z | Gristick, H.B. et al. Natively glycosylated HIV-1 Env structure reveals new mode for antibody recognition of the CD4-binding site. <i>Nat Struct Mol Biol</i> <b>23</b> , 906-915 (2016)                                                                    |
| 5CEZ | Garces, F. et al. Affinity Maturation of a Potent Family of HIV Antibodies Is Primarily Focused on Accommodating or Avoiding Glycans. <i>Immunity</i> <b>43</b> , 1053-63 (2015)                                                                            |
| 5CJX | Scharf, L. et al. Broadly Neutralizing Antibody 8ANC195 Recognizes Closed and Open States of HIV-1 Env. <i>Cell</i> <b>162</b> , 1379-90 (2015)                                                                                                             |
| 5D9Q | Jardine, J.G. et al. Minimally Mutated HIV-1 Broadly Neutralizing Antibodies to Guide                                                                                                                                                                       |

|      |                                                                                                                                                                                                    |
|------|----------------------------------------------------------------------------------------------------------------------------------------------------------------------------------------------------|
|      | Reductionist Vaccine Design. <i>PLoS Pathog</i> <b>12</b> , e1005815 (2016)                                                                                                                        |
| 5FUU | Lee, J.H., Ozorowski, G. & Ward, A.B. Cryo-EM structure of a native, fully glycosylated, cleaved HIV-1 envelope trimer. <i>Science</i> <b>351</b> , 1043-8 (2016)                                  |
| 6MDT | Kumar, S. et al. Capturing the inherent structural dynamics of the HIV-1 envelope glycoprotein fusion peptide. <i>Nat Commun</i> <b>10</b> , 763 (2019).                                           |
| 6NQD | Ananthaswamy, N. et al. A sequestered fusion peptide in the structure of an HIV-1 transmitted founder envelope trimer. <i>Nat Commun</i> <b>10</b> , 873 (2019)                                    |
| 6OKP | Schoofs, T. et al. Broad and Potent Neutralizing Antibodies Recognize the Silent Face of the HIV Envelope. <i>Immunity</i> <b>50</b> , 1513-1529 e9 (2019)                                         |
| 6ORO | Barnes, C.O. et al. Structural characterization of a highly-potent V3-glycan broadly neutralizing antibody bound to natively-glycosylated HIV-1 envelope. <i>Nat Commun</i> <b>9</b> , 1251 (2018) |
| 6CH7 | Escolano, A. et al. Immunization expands B cells specific to HIV-1 V3 glycan in mice and macaques. <i>Nature</i> <b>570</b> , 468-473 (2019)                                                       |

## References

1. Zheng, S.Q. et al. MotionCor2: anisotropic correction of beam-induced motion for improved cryo-electron microscopy. *Nat Methods* **14**, 331-332 (2017).
2. Zhang, K. Gctf: Real-time CTF determination and correction. *J Struct Biol* **193**, 1-12 (2016).
3. Zivanov, J. et al. New tools for automated high-resolution cryo-EM structure determination in RELION-3. *Elife* **7** (2018).
4. Scheres, S.H. RELION: implementation of a Bayesian approach to cryo-EM structure determination. *J Struct Biol* **180**, 519-30 (2012).
